# Supplementary material for: Prospective Evaluation of the Addition of Polygenic Risk Scores to Breast Cancer Risk Models
Source: PubMed Central journal article supplement (PMC8099999; doi:10.1093/jncics/pkab021), 2021-03-02
Supplement: pkab021_supplementary_data.pdf [file pkab021_supplementary_data.pdf]

## **Supplementary Materials**

Title: Prospective evaluation of the addition of polygenic risk scores to breast cancer risk models

Authors: Sherly X Li, Roger L Milne, Tu Nguyen-Dumont, Xiaochuan Wang, Dallas R English, Graham G Giles, Melissa C Southey, Antonis C Antoniou, Andrew Lee, Shuai Li, Ingrid Winship, John L Hopper, Mary Beth Terry, Robert J MacInnis.

This supplementary material has been provided by the authors to give readers additional information about their work.

Supplementary Table 1: Summary of inputs for IBIS and BOADICEA risk models and their availability within the Melbourne Collaborative Cohort Study<sup>a</sup>

| Components                                   | IBIS | BOADICEA | Availability in MCCS |
|----------------------------------------------|------|----------|----------------------|
| <b>Personal information</b>                  |      |          |                      |
| Age                                          | ●    | ●        | ●                    |
| Year of birth                                |      | ●        | ●                    |
| Ashkenazi Jewish heritage                    | ●    | ●        |                      |
| Height                                       | ●    | ●        | ●                    |
| Body mass index                              | ●    | ●        | ●                    |
| Identical twin status                        |      | ●        |                      |
| Alcohol intake                               |      | ●        | ●                    |
| Age at menarche                              | ●    | ●        | ●                    |
| No. of live births                           | ●    | ●        | ●                    |
| Age at first birth                           | ●    | ●        | ●                    |
| Menopausal status                            | ●    | ●        | ●                    |
| Age at menopause                             |      | ●        | ●                    |
| Oral contraceptive pill use                  |      | ●        | ●                    |
| Menopausal hormone therapy use               | ●    | ●        | ●                    |
| History of hyperplasia (atypical or typical) | ●    |          |                      |
| History of lobular carcinoma in situ         | ●    |          | ●                    |
| Previous breast biopsy                       | ●    |          |                      |
| History of ovarian cancer                    | ●    | ●        | ●                    |
| <b>Family history</b>                        |      |          |                      |
| Breast cancer                                | ●    | ●        | ●                    |
| Contralateral breast cancer                  |      | ●        |                      |
| Ovarian cancer                               | ●    | ●        |                      |
| Pancreatic cancer                            |      | ●        |                      |
| Prostate cancer                              |      | ●        | ●                    |
| Age at cancer diagnosis                      | ●    | ●        | ●                    |
| <b>Mammogram</b>                             |      |          |                      |
| Mammographic density                         | ●    | ●        | *                    |

Genetic information

|                              |   |   |   |
|------------------------------|---|---|---|
| <i>BRCA1</i> mutation status | ● | ● | * |
| <i>BRCA2</i> mutation status | ● | ● | * |
| <i>PALB2</i> mutation status |   | ● |   |
| <i>ATM</i> mutation status   |   | ● |   |
| <i>CHEK2</i> mutation status |   | ● |   |
| Polygenic risk score         | ● | ● | ● |

Follow-up

|                            |                                                     |                                 |
|----------------------------|-----------------------------------------------------|---------------------------------|
| Underlying incidence rates | UK<br>2005-<br>2009<br>Thames<br>Cancer<br>Registry | Australia:<br>1982-2010<br>AIHW |
|----------------------------|-----------------------------------------------------|---------------------------------|

---

<sup>a</sup> IBIS: International Breast Cancer Intervention Study model (version 8b), BOADICEA: the Breast and Ovarian Analysis of Disease Incidence and Carrier Estimation Algorithm model (version 5.0.0), MCCS: Melbourne Collaborative Cohort Study, AIHW: Australian Institute of Health and Welfare. \* = Not available for most participants eligible for this study so not included in our analyses

Supplementary Table 2: Calibration statistics for IBIS and BOADICEA 10-year risk scores stratified by quantiles of breast cancer risk<sup>a</sup>

| Risk model                                | Case-cohort, No. | Sub-cohort, No. | Expected No. of cases | Observed No. of cases | Expected /Observed ratio (robust 95%CI) |
|-------------------------------------------|------------------|-----------------|-----------------------|-----------------------|-----------------------------------------|
| <b>IBIS</b>                               |                  |                 |                       |                       |                                         |
| Family history and lifestyle factors      |                  |                 |                       |                       |                                         |
| <1.7%                                     | 80               | 69              | 5.0                   | 12                    | 0.42 (0.24,0.74)                        |
| ≥1.7 to 3.4%                              | 2026             | 1855            | 204.8                 | 226                   | 0.91 (0.80,1.03)                        |
| ≥3.4to 5%                                 | 615              | 546             | 96.6                  | 94                    | 1.03 (0.84,1.26)                        |
| ≥5%                                       | 377              | 313             | 95.7                  | 76                    | 1.26 (1.00,1.59)                        |
| Family history, lifestyle factors and PRS |                  |                 |                       |                       |                                         |
| <1.7%                                     | 799              | 748             | 38.0                  | 61                    | 0.62 (0.48,0.80)                        |
| ≥1.7 to 3.4%                              | 1079             | 988             | 105.4                 | 122                   | 0.86 (0.72,1.03)                        |
| ≥3.4to 5%                                 | 558              | 502             | 88.5                  | 83                    | 1.07 (0.86,1.32)                        |
| ≥5%                                       | 662              | 545             | 199.4                 | 142                   | 1.40 (1.18,1.67)                        |
| <b>BOADICEA</b>                           |                  |                 |                       |                       |                                         |
| Family history and lifestyle factors      |                  |                 |                       |                       |                                         |
| <1.7%                                     | 518              | 481             | 30.5                  | 47                    | 0.65 (0.49,0.86)                        |
| ≥1.7 to 3.4%                              | 1970             | 1785            | 200.4                 | 238                   | 0.84 (0.74,0.96)                        |
| ≥3.4to 5%                                 | 481              | 413             | 73.2                  | 91                    | 0.80 (0.65,0.99)                        |
| ≥5%                                       | 129              | 104             | 30.5                  | 32                    | 0.95 (0.67,1.35)                        |
| Family history, lifestyle factors and PRS |                  |                 |                       |                       |                                         |
| <1.7%                                     | 811              | 762             | 46.2                  | 58                    | 0.80 (0.62,1.03)                        |
| ≥1.7 to 3.4%                              | 1482             | 1351            | 151.1                 | 173                   | 0.87 (0.75,1.01)                        |
| ≥3.4to 5%                                 | 527              | 451             | 84.1                  | 103                   | 0.82 (0.67,0.99)                        |
| ≥5%                                       | 278              | 219             | 65.6                  | 74                    | 0.89 (0.70,1.12)                        |

<sup>a</sup> CI: confidence interval, PRS: polygenic risk score based on 313 single-nucleotide polymorphisms associated with breast cancer, IBIS: International Breast Cancer Intervention Study model (version 8b), BOADICEA: Breast and Ovarian Analysis of Disease Incidence and Carrier Estimation Algorithm model (version 5.0.0).

Supplementary Table 3: Calibration statistics for IBIS and BOADICEA 10-year risk scores stratified by family history of breast cancer<sup>a</sup>

| Risk model                                | Case-cohort, No. | Sub-cohort, No. | Expected No. of cases | Observed No. of cases | Expected /Observed ratio (robust 95%CI) | Concordance statistic (95%CI) |
|-------------------------------------------|------------------|-----------------|-----------------------|-----------------------|-----------------------------------------|-------------------------------|
| <b>IBIS</b>                               |                  |                 |                       |                       |                                         |                               |
| Family history and lifestyle factors      |                  |                 |                       |                       |                                         |                               |
| No                                        | 2401             | 2185            | 259.6                 | 292                   | 0.89 (0.79,1.00)                        | 0.55 (0.51,0.58)              |
| Yes                                       | 697              | 598             | 142.0                 | 116                   | 1.22 (1.02,1.47)                        | 0.56 (0.51,0.61)              |
| Lifestyle factors and PRS                 |                  |                 |                       |                       |                                         |                               |
| No                                        | 2401             | 2185            | 303.5                 | 292                   | 1.04 (0.92,1.17)                        | 0.61 (0.58,0.65)              |
| Yes                                       | 697              | 598             | 92.8                  | 116                   | 0.80 (0.66,0.97)                        | 0.63 (0.58,0.68)              |
| Family history, lifestyle factors and PRS |                  |                 |                       |                       |                                         |                               |
| No                                        | 2401             | 2185            | 272.3                 | 292                   | 0.93 (0.83,1.05)                        | 0.61 (0.58,0.65)              |
| Yes                                       | 697              | 598             | 159.7                 | 116                   | 1.38 (1.13,1.67)                        | 0.63 (0.58,0.68)              |
| <b>BOADICEA</b>                           |                  |                 |                       |                       |                                         |                               |
| Family history and lifestyle factors      |                  |                 |                       |                       |                                         |                               |
| No                                        | 2401             | 2185            | 239.1                 | 292                   | 0.82 (0.73,0.92)                        | 0.55 (0.51,0.58)              |
| Yes                                       | 697              | 598             | 95.9                  | 116                   | 0.83 (0.69,0.99)                        | 0.56 (0.51,0.62)              |
| Lifestyle factors and PRS                 |                  |                 |                       |                       |                                         |                               |
| No                                        | 2401             | 2185            | 267.4                 | 292                   | 0.92 (0.81,1.03)                        | 0.61 (0.57,0.64)              |
| Yes                                       | 697              | 598             | 80.3                  | 116                   | 0.69 (0.57,0.83)                        | 0.62 (0.57,0.67)              |
| Family history, lifestyle factors and PRS |                  |                 |                       |                       |                                         |                               |
| No                                        | 2401             | 2185            | 249.1                 | 292                   | 0.85 (0.76,0.96)                        | 0.61 (0.57,0.64)              |
| Yes                                       | 697              | 598             | 98.1                  | 116                   | 0.85 (0.70,1.02)                        | 0.61 (0.56,0.66)              |

<sup>a</sup> Relatives with breast cancer investigated by the model: mother, sister/s, grandmothers (paternal and maternal), aunt/s (paternal and maternal), daughter/s. CI: confidence interval, PRS: polygenic risk score based on 313 single-nucleotide polymorphisms associated with breast cancer, IBIS: International Breast Cancer Intervention Study model (version 8b), BOADICEA: Breast and Ovarian Analysis of Disease Incidence and Carrier Estimation Algorithm model (version 5.0.0)

Supplementary Table 4: Calibration and discrimination for BOADICEA 10-year risk scores using updated Australian breast cancer incidence rates<sup>a</sup>

| Risk model                                    | Case-cohort, No. | Sub-cohort, No. | Expected No. of cases | Observed No. of cases | Expected /Observed ratio (robust 95%CI) | Concordance statistic (95%CI) |
|-----------------------------------------------|------------------|-----------------|-----------------------|-----------------------|-----------------------------------------|-------------------------------|
| BOADICEA                                      | 3098             | 2783            | 362.5                 | 408                   | 0.89 (0.80,0.98)                        | 0.62 (0.59,0.64)              |
| Stratified by age                             |                  |                 |                       |                       |                                         |                               |
| 50-64 years                                   | 1732             | 1549            | 230.5                 | 235                   | 0.98 (0.86,1.12)                        | 0.65 (0.62,0.68)              |
| 65-75 years                                   | 1366             | 1234            | 132.3                 | 173                   | 0.76 (0.66,0.89)                        | 0.57 (0.53,0.62)              |
| Stratified by family history of breast cancer |                  |                 |                       |                       |                                         |                               |
| No family history                             | 2401             | 2185            | 260.6                 | 292                   | 0.89 (0.79,1.00)                        | 0.61 (0.57,0.64)              |
| Family history                                | 697              | 598             | 102.2                 | 116                   | 0.88 (0.73,1.06)                        | 0.61 (0.56,0.66)              |
| Stratified by quintiles of 10-year risk       |                  |                 |                       |                       |                                         |                               |
| <1.7%                                         | 719              | 678             | 41.4                  | 49                    | 0.84 (0.64,1.12)                        | --                            |
| ≥1.7 to 3.4%                                  | 1492             | 1359            | 152.9                 | 173                   | 0.88 (0.76,1.03)                        | --                            |
| ≥3.4to 5%                                     | 553              | 482             | 89.5                  | 99                    | 0.90 (0.74,1.10)                        | --                            |
| ≥5%                                           | 334              | 264             | 78.7                  | 87                    | 0.90 (0.73,1.12)                        | --                            |

<sup>a</sup> Models includes age, family history, lifestyle and PRS. CI: confidence interval, PRS: polygenic risk score based on 313 single-nucleotide polymorphisms associated with breast cancer, BOADICEA: Breast and Ovarian Analysis of Disease Incidence and Carrier Estimation Algorithm model (version 5.0.0)

Supplementary Table 5: Calibration and discrimination for IBIS and BOADICEA 5-year risk scores of breast cancer<sup>a</sup>

| Risk models                                   | Casestart<br>N | Subcohort<br>N | Expected<br>number<br>of cases | Observed<br>number of<br>cases | Expected<br>/Observed ratio<br>(robust 95%CI) | Concordance<br>statistic (95%CI) |
|-----------------------------------------------|----------------|----------------|--------------------------------|--------------------------------|-----------------------------------------------|----------------------------------|
| IBIS                                          | 3098           | 2783           | 223.2                          | 213                            | 1.05 (0.91,1.20)                              | 0.63 (0.60,0.66)                 |
| BOADICEA                                      | 3098           | 2783           | 186.0                          | 213                            | 0.87 (0.76,1.00)                              | 0.64 (0.61,0.67)                 |
| Stratified by age                             |                |                |                                |                                |                                               |                                  |
| IBIS                                          |                |                |                                |                                |                                               |                                  |
| 50-64 years                                   | 1732           | 1549           | 124.6                          | 116                            | 1.07 (0.89,1.30)                              | 0.64 (0.61,0.68)                 |
| 65-75 years                                   | 1366           | 1234           | 98.6                           | 97                             | 1.02 (0.83,1.25)                              | 0.62 (0.57,0.67)                 |
| BOADICEA                                      |                |                |                                |                                |                                               |                                  |
| 50-64 years                                   | 1732           | 1549           | 113.0                          | 116                            | 0.97 (0.81,1.17)                              | 0.66 (0.62,0.69)                 |
| 65-75 years                                   | 1366           | 1234           | 73.1                           | 97                             | 0.75 (0.62,0.92)                              | 0.60 (0.56,0.65)                 |
| Stratified by family history of breast cancer |                |                |                                |                                |                                               |                                  |
| IBIS                                          |                |                |                                |                                |                                               |                                  |
| No family<br>history                          | 2401           | 2185           | 140.1                          | 150                            | 0.93 (0.79,1.10)                              | 0.62 (0.59,0.66)                 |
| Family<br>history                             | 697            | 598            | 83.6                           | 63                             | 1.33 (1.03,1.71)                              | 0.64 (0.58,0.69)                 |
| BOADICEA                                      |                |                |                                |                                |                                               |                                  |
| No family<br>history                          | 2401           | 2185           | 133.1                          | 150                            | 0.89 (0.75,1.04)                              | 0.62 (0.59,0.66)                 |
| Family<br>history                             | 697            | 598            | 53.1                           | 63                             | 0.84 (0.66,1.08)                              | 0.64 (0.59,0.70)                 |
| Stratified by quintiles of breast cancer risk |                |                |                                |                                |                                               |                                  |
| IBIS                                          |                |                |                                |                                |                                               |                                  |
| <0.9%                                         | 934            | 868            | 23.9                           | 39                             | 0.61 (0.45,0.84)                              | --                               |
| ≥0.9 to 1.7%                                  | 1013           | 934            | 53.7                           | 61                             | 0.88 (0.68,1.13)                              | --                               |
| ≥1.7 to 2.5%                                  | 532            | 478            | 45.2                           | 31                             | 1.46 (1.02,2.07)                              | --                               |
| ≥2.5%                                         | 619            | 503            | 100.5                          | 82                             | 1.23 (0.98,1.53)                              | --                               |
| BOADICEA                                      |                |                |                                |                                |                                               |                                  |
| <0.9%                                         | 810            | 756            | 23.4                           | 35                             | 0.67 (0.48,0.93)                              | --                               |
| ≥0.9 to 1.7%                                  | 1410           | 1293           | 73.1                           | 83                             | 0.88 (0.71,1.09)                              | --                               |
| ≥1.7 to 2.5%                                  | 488            | 419            | 38.8                           | 43                             | 0.90 (0.67,1.22)                              | --                               |
| ≥2.5%                                         | 390            | 315            | 50.7                           | 52                             | 0.98 (0.74,1.28)                              | --                               |

<sup>a</sup> Models include age, family history, lifestyle and PRS. Calibration based on number of cases with 5 or less years of follow up and discrimination based on no more than 5 years of follow up. N: number, CI: confidence interval, PRS: polygenic risk score based on 313 single-nucleotide polymorphisms associated with breast cancer, IBIS: International Breast Cancer Intervention Study model (version 8b), BOADICEA: Breast and Ovarian Analysis of Disease Incidence and Carrier Estimation Algorithm model (version 5.0.0)

Supplementary Figure 1: Melbourne Collaborative Cohort Study case cohort flowchart.<sup>a</sup>

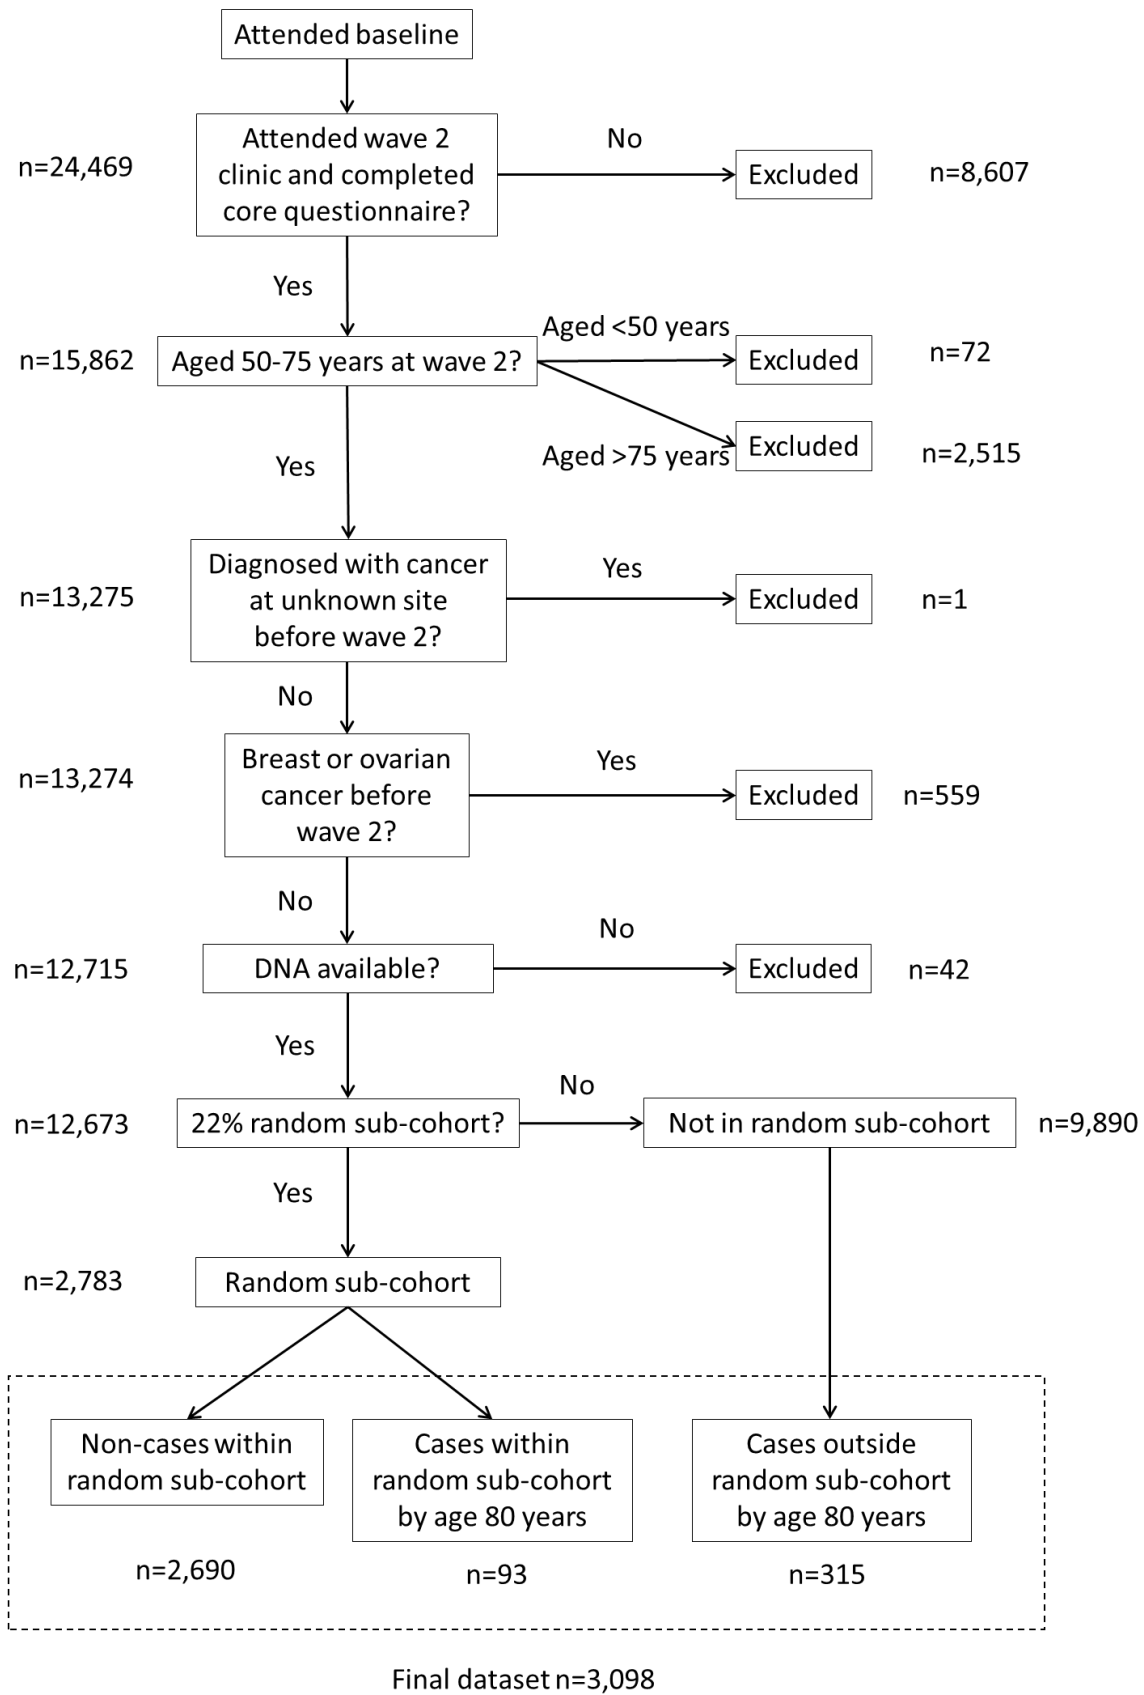

<sup>a</sup> N=number of participants



Supplementary Figure 2: Box plot of 10-year risk of breast cancer, comparison between BOADICEA and IBIS risk models<sup>a</sup>

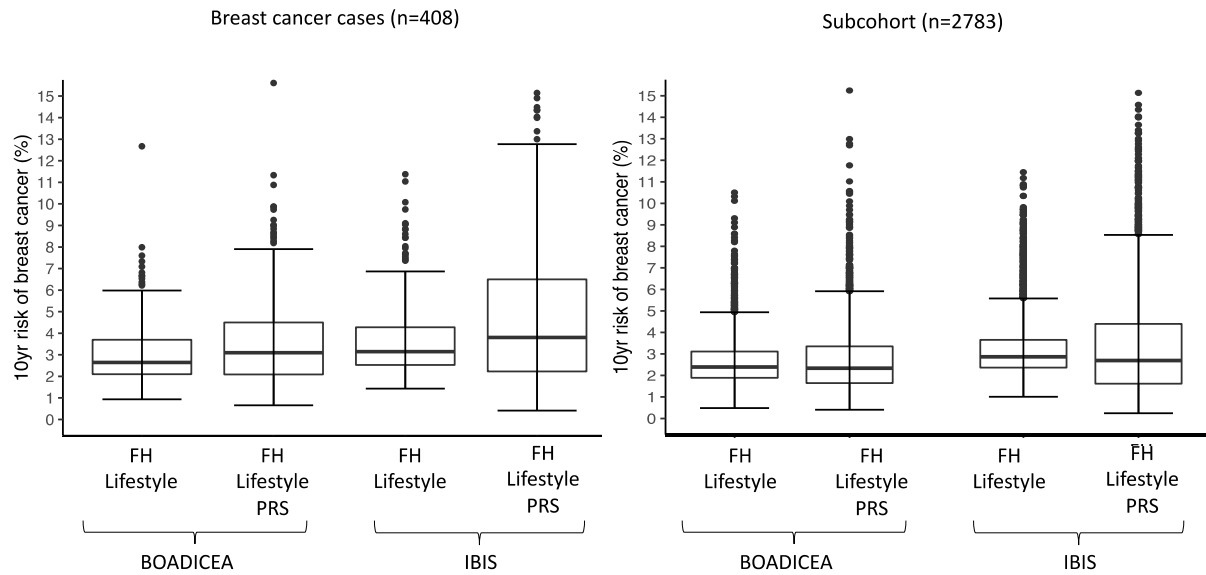

<sup>a</sup> Bold line within each box represents the median and borders of boxes represent the interquartile range for each risk prediction model. Sub-cohort includes 93 breast cancer cases and 2690 non-cases. n: number, FH: family history, PRS: polygenic risk score based on 313 single-nucleotide polymorphisms associated with breast cancer, IBIS: International Breast Cancer Intervention Study model (version 8b), BOADICEA: Breast and Ovarian Analysis of Disease Incidence and Carrier Estimation Algorithm model (version 5.0.0)
